# Supplementary material
Source: publisher figshare collection journal article supplement (https://acs.figshare.com/ndownloader/files/4538452)
Supplement: Supplementary file 1 [file 4538452]

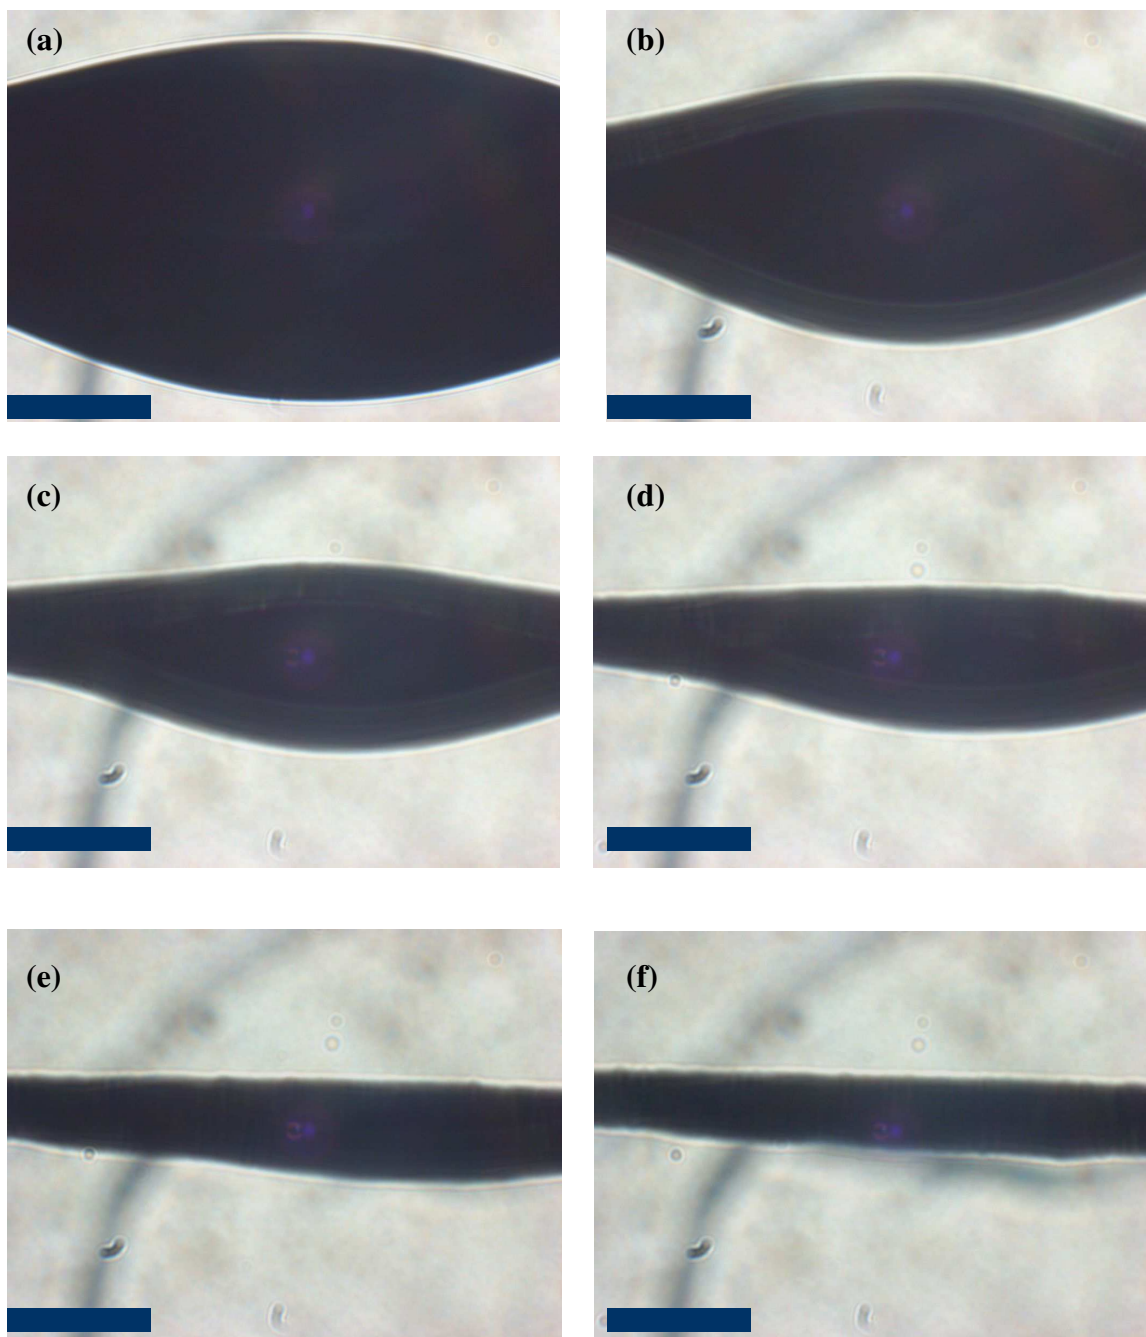

**Figure S1.** Time-lapse optical microscopy images depicting different drying stages of a bead on the 0.5wt% SWNT/PSS/PDDA polyelectrolyte fiber at (a) 0, (b) 8, (c) 16, (d) 24, (e) 32, and (f) 40 minute intervals. (All images taken at room temperature using a 100X objective) (Scale bar at the bottom = 100 $\mu$ m). Individual nuclear fibers can be seen as striations that appear at the edges of the bead as it dries, eventually collapsing together forming a single fiber strand.

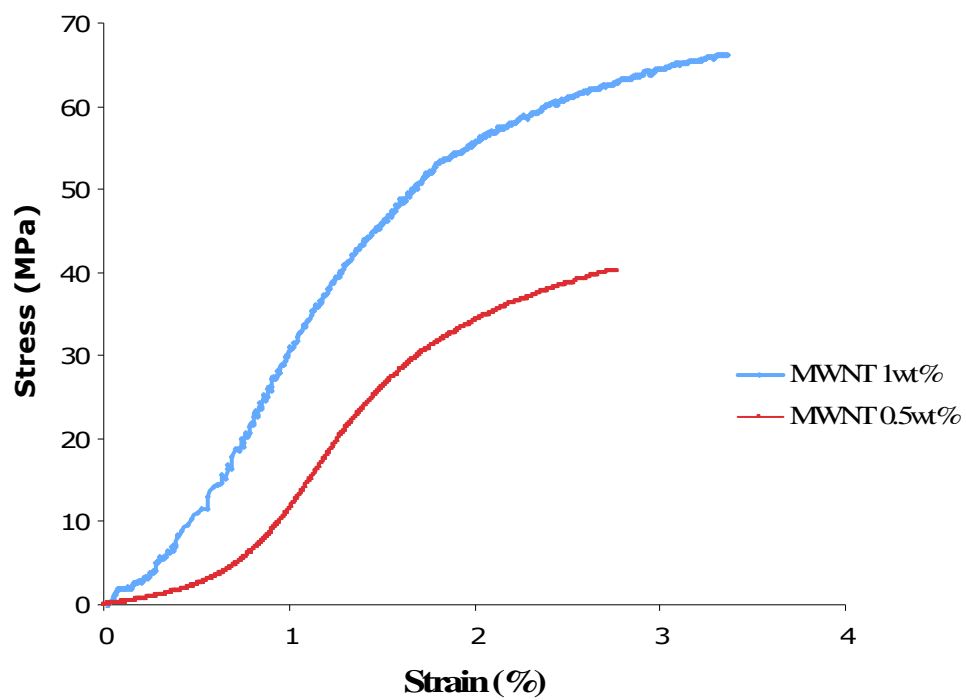

**Figure S2.** Comparative engineering stress-strain curves for different concentrations of MWNT in a PSS/PDDA complex system.

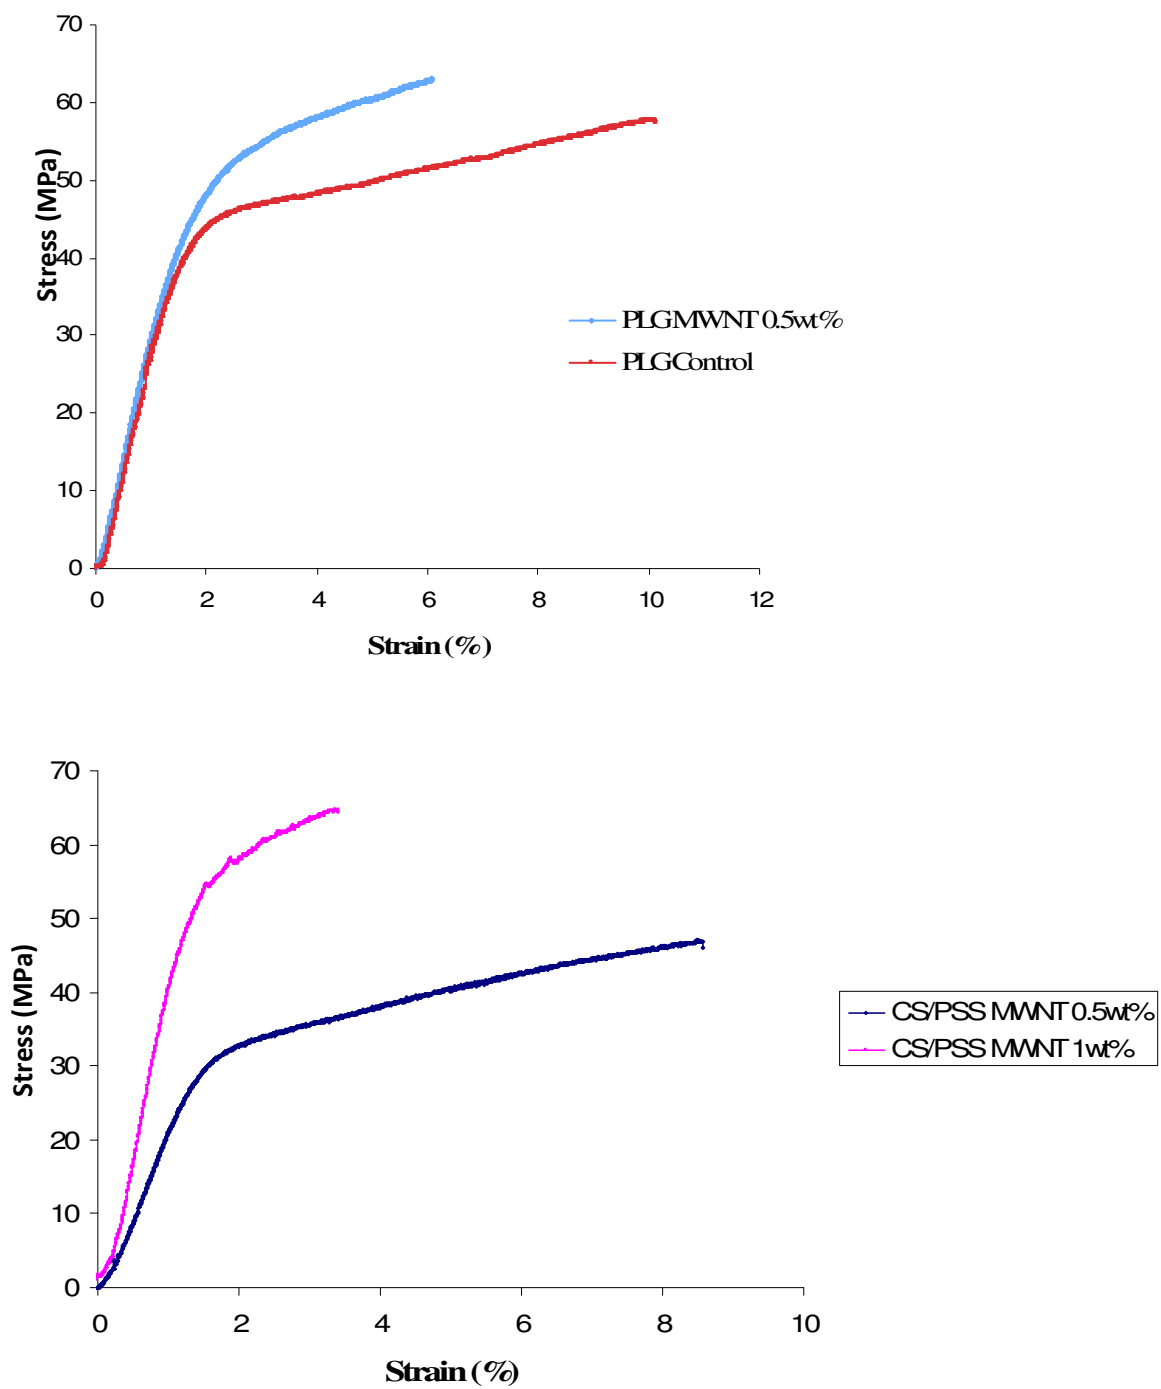

**Figure S3.** Engineering stress-strain curves for (a) MWNT-PLG/Chitosan and (b) MWNT-PSS/Chitosan complex based fibers.

**Table 1** Tensile properties for fibers of different polyelectrolyte systems containing MWNTs.

| <b>Polyelectrolyte System</b> | <b>MWNT Conc. (wt%)</b> | <b>Young's Modulus (GPa)</b> | <b>Tensile Strength (MPa)</b> | <b>Strain to break (%)</b> |
|-------------------------------|-------------------------|------------------------------|-------------------------------|----------------------------|
| <b>PSS/PDDA</b>               | 0.5                     | 3.2                          | 40                            | 2.76                       |
|                               | 1                       | 3.8                          | 66                            | 3.36                       |
| <b>PSS/CS</b>                 | 0.5                     | 2.38                         | 45.93                         | 8.96                       |
|                               | 1                       | 4.71                         | 64.42                         | 3.4                        |
| <b>PLG/CS</b>                 | 0.5                     | 3.24                         | 63                            | 6.07                       |

( PSS = Polystyrenesulfonate, PDDA = Polydiallyldimethylammonium chloride, CS = Chitosan, PLG = Poly(L-glutamic acid) )

(Due to limited sample availability of PLG, only one MWNT concentration was used).
